# Supplementary material
Source: Elsevier journal article supplement (https://www.sciencedirect.com/science/article/pii/S2253654X16300063)
Supplement: mmc1 [file S2253654X16300063:mmc1.xlsx]

## Sheet: Analisis-STATGraph
WB_CTAC	kBq/mL	Second angular moment	Contrast	Homogeneity	Dissimilarity	Inverse difference moment	Short run emphasis	Long run emphasis	Intensity variability	Run-length variability	Run percentage	Low-intensity run emphasis	High-intensity run emphasis	Low-intensity short-run emphasis	High-intensity short-run emphasis	Low-intensity long-run emphasis	High-intensity long-run emphasis	Coarseness	Contrast	Busyness	Complexity	Strength	Short-zone emphasis	Large-zone emphasis	Intensity variability	Size-zone variability	Zone percentage	Low-intensity zone emphasis	High-intensity zone emphasis	Low-intensity short-zone emphasis	High-intensity short-zone emphasis	Low-intensity large-zone emphasis	High-intensity large-zone emphasis	Second angular moment	Contrast	Homogeneity	Dissimilarity	Inverse difference moment	Correlation	Minimum SUV	Maximum SUV	Mean SUV	SUV Variance	SUV SD	SUV Skewness	SUV Kurtosis	SUV bias-corrected Skewness	SUV bias-corrected Kurtosis	TLG
	19.5827	29858	160376	1051.72	20712	649.28	0.81389	1.8128	32.9573	728.525	0.81081	0.0027024	1043.52	0.0023792	869.291	0.0041231	1793.49	0.012766	0.00017534	0.33438	3.9537	15.9225	0.85179	1.9153	23.0655	602.336	0.61331	0.0030406	1081.25	0.0028111	936.228	0.0047085	1890.95	0.0017387	38.7008	0.25379	4.9981	0.15668	0.81964	0.88183	1.2424	1.0509	0.0038347	0.061897	0.35232	2.5512	0.3528	2.9977	74.4575
	14.8334	26311	195534	983.351	23010	579.475	0.82186	1.7608	33.0225	733.229	0.79972	0.0028561	1023.79	0.0024128	845.075	0.004693	1799.07	0.01111	0.00019356	0.41812	4.2222	13.0012	0.85778	1.7971	24.6142	623.18	0.62509	0.003222	1028.76	0.0027934	879.591	0.0052921	1839.74	0.0015299	47.1507	0.23712	5.5486	0.13973	0.7708	0.9181	1.229	1.0631	0.0026206	0.051169	0.13415	2.5657	0.13433	2.8301	75.3185
	13.5787	29170	174848	1029.72	21520	626.523	0.8195	1.8041	35.0599	737.559	0.81012	0.0029848	909.346	0.0026428	748.38	0.0044729	1617.41	0.011152	0.00017744	0.45882	3.7168	12.3483	0.85868	1.8602	25.5593	619.447	0.61954	0.0033364	913.596	0.0030462	791.878	0.0049509	1660.81	0.001697	42.1727	0.24837	5.1905	0.15112	0.7742	0.92826	1.2947	1.0876	0.0033096	0.057503	0.26107	2.5596	0.26143	2.9531	77.0507
	12.3519	29642	191444	1016.91	22392	614.893	0.82774	1.7674	35.9511	748.628	0.80735	0.0031456	860.66	0.0027752	715.003	0.0047184	1525.55	0.010391	0.00019199	0.54221	3.5549	9.9917	0.8507	1.8576	26.6502	605.123	0.61816	0.0034285	867.019	0.003088	740.037	0.0052404	1606.61	0.0017145	46.0423	0.24457	5.3853	0.14788	0.73227	0.95782	1.2912	1.1	0.0024848	0.049825	0.1558	2.5693	0.15601	2.8805	77.9296
	11.2359	24892	227374	945.448	24870	548.75	0.83048	1.7237	34.2438	757.308	0.81012	0.0021735	1237.53	0.0019872	1028.09	0.0029796	2120.53	0.0095015	0.00019925	0.52089	4.9613	11.3659	0.85951	1.7971	25.1707	625.887	0.62509	0.0024702	1250.08	0.0023128	1074.05	0.0033492	2228.31	0.0014411	54.7098	0.22749	5.9841	0.13204	0.7232	0.95688	1.2709	1.1208	0.0025146	0.050124	0.067684	2.5699	0.067776	2.8754	79.4063
	9.59552	30029	210516	967.665	23792	563.878	0.83898	1.7067	39.0529	774.705	0.81289	0.0064421	620.537	0.0056146	527.037	0.009892	1031.11	0.0092605	0.00021697	0.6741	3.2128	7.71	0.86193	1.8324	28.7248	629.326	0.62439	0.0069012	627.705	0.0061047	546.614	0.011003	1108.64	0.0017261	50.4713	0.232	5.7041	0.13519	0.67899	1.0285	1.3986	1.1591	0.002755	0.052465	0.26022	2.5696	0.26058	3.2391	82.1169
	7.742	22965	275488	884.376	27564	492.769	0.85145	1.6664	32.2349	779.451	0.79349	0.0028383	1017.28	0.0025685	864.837	0.0039873	1707.91	0.0091536	0.00024385	0.49821	5.1233	10.3843	0.88131	1.7055	25.8069	680.758	0.64241	0.003075	1015.91	0.0028471	893.386	0.0042865	1736.71	0.0013213	66.0801	0.21213	6.6117	0.1182	0.69681	1.0054	1.379	1.1781	0.0038515	0.062032	0.27902	2.56	0.2794	2.993	83.4685
	6.36595	25354	254216	918.103	26184	523.333	0.84245	1.6632	34.2863	766.412	0.79626	0.0021614	1247.18	0.0019795	1057.2	0.0029186	2045.88	0.009137	0.00021753	0.55759	4.8232	10.112	0.87363	1.7394	26.1887	660.232	0.63548	0.0024161	1252.66	0.0022734	1093.92	0.0032482	2145.63	0.0014609	61.0216	0.22038	6.2852	0.12562	0.68711	0.99603	1.3911	1.2024	0.0038705	0.062185	0.043722	2.5606	0.043781	2.9658	85.1872
	4.38639	22712	295508	854.043	28552	455.272	0.86264	1.5895	33.1371	816.88	0.80873	0.0030819	1040.22	0.0028416	903.067	0.0040803	1634.2	0.0091732	0.00024084	0.50343	5.4921	10.5205	0.88129	1.6328	25.7645	685.441	0.64726	0.0034586	1040.82	0.0032589	919.492	0.0044488	1682.65	0.0012912	70.4597	0.20363	6.8078	0.10855	0.67794	1.0127	1.4596	1.2218	0.005456	0.073831	0.15835	2.5479	0.15856	3.0426	86.5593
	2.98448	25750	263062	932.414	26214	544.407	0.82158	1.775	36.2897	735.409	0.80388	0.0027498	972.684	0.0024183	829.702	0.0041929	1588.61	0.0085138	0.00021795	0.63593	4.8423	9.3838	0.8641	1.785	26.7839	636.927	0.62855	0.002992	1027.13	0.0027543	908.643	0.0044215	1652.38	0.0014995	63.4802	0.225	6.3258	0.13137	0.65721	1.002	1.5746	1.2655	0.0076277	0.087297	0.3357	2.5349	0.33615	3.1053	89.6611
	2.04348	23983	289934	910.944	27518	528.036	0.83875	1.6939	34.5228	753.1	0.79002	0.0041733	872.83	0.0038141	737.679	0.0056909	1450.7	0.0088766	0.00022972	0.57619	5.0769	9.5953	0.87526	1.6749	26.3866	669.026	0.64172	0.0047665	874.424	0.0044639	765.182	0.0062529	1454.9	0.0013879	69.746	0.21913	6.6197	0.12702	0.64651	0.9944	1.6472	1.2727	0.010482	0.10233	0.067124	2.5112	0.067215	3.086	90.1665
	1.39918	22982	332466	868.453	29694	489.387	0.88475	1.4846	32.5869	838.063	0.78517	0.003431	850.628	0.0031867	761.143	0.0044366	1235.95	0.0080829	0.00029322	0.55494	5.7143	9.1222	0.90611	1.4979	26.6646	756.215	0.66944	0.0036862	861.96	0.0034801	789.734	0.0047722	1238.24	0.0013078	79.3096	0.20717	7.0835	0.11674	0.64255	0.99976	1.7373	1.3061	0.01531	0.12368	0.46413	2.4876	0.46476	3.0032	92.5334
	0.958025	25199	265412	915.978	26600	522.99	0.84201	1.6647	34.9914	772.95	0.80388	0.0056606	972.576	0.002786	836.569	0.017216	1535.94	0.0091138	0.00022847	0.56069	4.6916	9.529	0.86852	1.7257	26.5388	649.85	0.6341	0.0034456	999.462	0.0022377	883.995	0.013475	1633.94	0.0014471	63.6022	0.2195	6.3743	0.12533	0.67415	0.85872	1.8713	1.3197	0.025101	0.15836	0.16424	2.4236	0.16446	3.1034	93.4992
	0.655963	23051	316562	862.405	29126	474.466	0.84927	1.6765	33.1221	775.959	0.79487	0.0048856	779.43	0.0043786	663.653	0.0070265	1299.67	0.0085631	0.00025513	0.52829	5.9435	10.8517	0.87929	1.6879	25.8726	676.484	0.64172	0.0053619	787.601	0.004958	697.106	0.007336	1310.24	0.0013288	76.0053	0.20706	6.993	0.11392	0.65966	0.87636	1.9679	1.3079	0.033134	0.18194	0.50132	2.3951	0.50201	3.3446	92.659
	Shapiro-Wilks	0.0391					0.3136			0.11	0.2845												0.1881		0.2407		0.2668																			0.0007		0.4379
	Mean	25849.9	246624	938.681	25553.4	543.819	0.838954	1.69924	34.3899	765.584	0.801951	0.00352046	960.586	0.00298465	813.337	0.00574486	1599	0.00962821	0.00022009	0.525985	4.66635	10.7027	0.869279	1.75063	25.9851	651.445	0.633304	0.00368577	973.456	0.0033164	851.418	0.00591323	1656.41	0.00149227	59.2109	0.225524	6.13655	0.130671	0.702931	0.95834	1.48249	1.18969	0.00873943	0.0839027	0.231775	2.52901	0.23209	3.02999	84.2867
	SD	2752	54036.6	63.6561	2888.59	58.1997	0.0190964	0.0881213	1.83228	31.5626	0.00875829	0.00129689	166.503	0.00100007	138.104	0.00374632	295.917	0.00128194	3.223e-05	0.0850436	0.826793	2.00933	0.0148658	0.108473	1.2679	40.8948	0.0146394	0.00121495	168.772	0.00111856	144.382	0.00291464	316.294	0.000165278	12.8242	0.0159431	0.677429	0.0143648	0.0538401	0.0564732	0.240591	0.0952035	0.00950013	0.0426824	0.144256	0.0562563	0.144454	0.140446	6.74489
	95% IC +	27087.3	270922	967.304	26852.3	569.988	0.84754	1.73886	35.2138	779.776	0.805889	0.0041036	1035.45	0.00343433	875.436	0.00742938	1732.06	0.0102046	0.000234582	0.564225	5.03811	11.6062	0.875963	1.7994	26.5552	669.833	0.639887	0.00423207	1049.34	0.00381936	916.339	0.00722378	1798.63	0.00156659	64.9772	0.232693	6.44115	0.13713	0.72714	0.983733	1.59067	1.2325	0.0130111	0.103095	0.296639	2.55431	0.297043	3.09314	87.3195
	95% IC -	24612.4	222327	910.058	24254.6	517.649	0.830367	1.65961	33.566	751.392	0.798013	0.00293732	885.718	0.00253497	751.239	0.00406035	1465.94	0.00905179	0.000205598	0.487745	4.29459	9.79926	0.862594	1.70185	25.415	633.057	0.626722	0.00313947	897.568	0.00281344	786.497	0.00460267	1514.19	0.00141795	53.4445	0.218356	5.83195	0.124212	0.678722	0.932947	1.37431	1.14688	0.00446773	0.0647107	0.166911	2.50372	0.167137	2.96683	81.2539
	Variability	10.6461	21.9105	6.78144	11.3041	10.702	2.27622	5.18593	5.32797	4.12268	1.09212	36.8387	17.3335	33.5073	16.98	65.2116	18.5063	13.3145	14.644	16.1684	17.7182	18.7739	1.71013	6.1962	4.87934	6.27756	2.3116	32.9632	17.3374	33.7281	16.9578	49.2901	19.0951	11.0756	21.6585	7.06935	11.0392	10.9932	7.65937	5.89281	16.2289	8.00236	108.704	50.8713	62.2399	2.22444	62.2405	4.6352	8.00231
HN_CTAC	kBq/mL	Second angular moment	Contrast	Homogeneity	Dissimilarity	Inverse difference moment	Short run emphasis	Long run emphasis	Intensity variability	Run-length variability	Run percentage	Low-intensity run emphasis	High-intensity run emphasis	Low-intensity short-run emphasis	High-intensity short-run emphasis	Low-intensity long-run emphasis	High-intensity long-run emphasis	Coarseness	Contrast	Busyness	Complexity	Strength	Short-zone emphasis	Large-zone emphasis	Intensity variability	Size-zone variability	Zone percentage	Low-intensity zone emphasis	High-intensity zone emphasis	Low-intensity short-zone emphasis	High-intensity short-zone emphasis	Low-intensity large-zone emphasis	High-intensity large-zone emphasis	Second angular moment	Contrast	Homogeneity	Dissimilarity	Inverse difference moment	Correlation	Minimum SUV	Maximum SUV	Mean SUV	SUV Variance	SUV SD	SUV Skewness	SUV Kurtosis	SUV bias-corrected Skewness	SUV bias-corrected Kurtosis	TLG
	23.5168	637398	267268	5595.82	54668	3959.95	0.71822	2.4051	138.276	2505.23	0.82362	0.0032392	873.364	0.0023458	644.183	0.0075247	1991.83	0.0056023	1.8175e-05	0.84875	0.54483	8.0641	0.77215	3.0785	85.6839	1732.18	0.52165	0.0032948	919.371	0.0026519	721.853	0.0096394	2529.5	0.00219	15.6664	0.32801	3.2045	0.23212	0.92326	0.88978	1.4646	1.1358	0.008747	0.093515	0.26368	2.4596	0.26377	2.7808	41.6691
	19.5827	631396	303716	5375.75	58924	3690.07	0.74047	2.2143	143.117	2639	0.83646	0.0030878	911.268	0.0022185	684.893	0.0069515	1936.69	0.0049197	2.0352e-05	0.99252	0.58296	6.854	0.79334	2.718	91.1418	1913.58	0.55241	0.0032954	932.208	0.0026005	750.631	0.0079718	2345.2	0.0021328	17.6517	0.31243	3.4246	0.21446	0.91103	0.9066	1.452	1.1439	0.0076696	0.087566	0.36681	2.625	0.36693	2.9769	41.9501
	14.8334	559002	408176	5054.51	67620	3361.35	0.75736	2.1632	142.495	2655.89	0.8189	0.0042717	922.143	0.0025545	704.696	0.011437	1961.5	0.0042536	2.3098e-05	1.1849	0.68282	5.7748	0.80754	2.4645	94.4154	2051.01	0.57046	0.002936	942.179	0.0020294	767.044	0.010339	2244.4	0.001886	23.7091	0.29359	3.9277	0.19525	0.8784	0.93194	1.4068	1.1418	0.00562	0.074958	0.20254	2.6453	0.20261	2.9321	41.8722
	13.5787	710384	351186	5245.66	62830	3565.1	0.75059	2.1883	166.317	2675.38	0.83646	0.0016483	1020.02	0.0011279	781.574	0.0040014	2148.08	0.0040613	1.8121e-05	1.5702	0.61502	5.5268	0.79924	2.6989	105.563	1952.26	0.55494	0.0017491	1051.28	0.0012289	853.546	0.005175	2630.38	0.0023896	20.3681	0.30424	3.644	0.20677	0.86886	0.89058	1.4679	1.1634	0.0065813	0.081116	0.31617	2.6384	0.31628	3.2138	42.6656
	12.3519	833794	296840	5416.92	58092	3739.71	0.7304	2.2731	191.718	2600.42	0.84101	0.0028207	640.289	0.0021345	474.214	0.0060771	1410.33	0.0037645	1.4022e-05	2.2786	0.5648	5.3266	0.78269	2.8432	117.646	1831.94	0.54363	0.0030417	650.833	0.0024796	514.273	0.0075759	1755.96	0.0028283	17.2883	0.31549	3.3833	0.21781	0.85023	0.9489	1.5649	1.1749	0.0055653	0.074593	0.35023	2.6503	0.35035	3.3927	43.0848
	11.2359	716332	360814	5177.06	63858	3475.19	0.74898	2.1988	175.652	2641.18	0.82768	0.0017805	972.135	0.0014323	727.692	0.0034003	2142.53	0.0036849	1.5788e-05	2.0692	0.65929	5.0474	0.80798	2.5457	114.406	2032.84	0.56473	0.0019617	975.417	0.0016853	788.436	0.0040201	2479.75	0.0024191	20.9678	0.30085	3.7109	0.20195	0.8399	0.92709	1.4943	1.1896	0.005313	0.072882	0.046172	2.6526	0.046187	3.0637	43.6242
	9.59552	727660	394780	5152.78	66016	3487.83	0.73638	2.2307	181.255	2613.13	0.8346	0.0016497	1005.06	0.0012507	754.339	0.0034532	2181.8	0.0036983	1.6195e-05	1.9691	0.68141	5.2481	0.79526	2.7398	112.283	1923.92	0.55257	0.0017503	1032.07	0.0014289	837.746	0.0042468	2669.72	0.0024671	22.9871	0.30003	3.844	0.20309	0.83245	0.94026	1.5576	1.2307	0.0065782	0.081097	0.25855	2.6454	0.25864	3.461	45.1315
	7.742	503997	562976	4607.19	80096	2886.01	0.78536	1.9862	146.771	2824.05	0.81705	0.0021732	980.783	0.0017851	777.583	0.0039371	1896.43	0.003576	2.469e-05	1.4718	0.87841	5.1457	0.83161	2.1772	102.329	2275.26	0.59443	0.0023052	1010.82	0.0020027	849.469	0.0043579	2096.51	0.0016741	32.4463	0.26553	4.6162	0.16633	0.82985	0.96726	1.563	1.2414	0.0084796	0.092075	0.22859	2.6286	0.22867	2.9481	45.5257
	6.36595	588437	494264	4826.35	74540	3133.32	0.77489	2.0436	162.345	2796.04	0.82751	0.0021888	898.93	0.0017478	705.076	0.0041653	1795.36	0.0035361	2.2823e-05	1.7162	0.73134	4.6678	0.81929	2.2822	108.541	2164.54	0.5838	0.0022929	920.222	0.0019203	762.691	0.0047657	2012.65	0.0019609	28.5322	0.27861	4.3029	0.18088	0.82748	0.98474	1.6169	1.2626	0.0082926	0.091054	0.15773	2.6323	0.15778	3.0766	46.3018
	4.38639	547783	516730	4694.29	76834	2960.16	0.78395	1.9916	154.581	2846.09	0.8265	0.00236	848.175	0.0018655	670.937	0.0045778	1656.65	0.0035099	2.3707e-05	1.661	0.79413	4.8411	0.82853	2.1781	108.939	2251.66	0.59308	0.0023684	865.269	0.0019623	725.636	0.0049555	1829.18	0.0018179	29.7673	0.27042	4.4262	0.17053	0.82651	0.96375	1.7099	1.2799	0.012005	0.10955	0.27659	2.6043	0.27668	2.9298	46.9378
	2.98448	635926	505890	4788.81	75418	3085.83	0.76349	2.0692	170.923	2740.27	0.82954	0.0018649	982.811	0.0014758	767.205	0.0036013	1951.16	0.0033491	2.195e-05	1.7847	0.8057	4.9105	0.81413	2.333	111.223	2117.01	0.57873	0.0019814	1014.29	0.0016793	839.814	0.0040871	2229.1	0.0021243	29.2388	0.27678	4.3589	0.17835	0.82532	0.88865	1.8231	1.3205	0.018373	0.13553	0.34299	2.5653	0.3431	3.0719	48.4237
	2.04348	741449	442370	4909.78	70810	3187.67	0.75641	2.1524	191.818	2684.55	0.827	0.0017214	952.304	0.0013434	732.469	0.0034916	1991.56	0.0031809	1.9239e-05	2.3012	0.67492	4.3523	0.80995	2.5116	118.653	2057.91	0.56878	0.0018086	973.991	0.0015162	797.529	0.0040825	2342.26	0.0024938	25.655	0.28474	4.1066	0.18487	0.81277	0.78071	1.9922	1.3352	0.025052	0.15826	0.1929	2.5199	0.19296	3.0574	48.9644
	1.39918	595692	554010	4684.49	78894	2992.09	0.77988	2.0345	170.477	2810.01	0.82295	0.0021625	911.182	0.001755	719.492	0.0040523	1800.62	0.0032991	2.1354e-05	1.8127	0.88404	5.1757	0.83534	2.3294	109.666	2282.24	0.59021	0.0022609	942.437	0.0019587	795.568	0.0047006	2037.56	0.0019848	31.9793	0.2704	4.554	0.17271	0.80932	0.76452	2.1171	1.3646	0.038578	0.19639	0.34003	2.4588	0.34014	3.213	50.0418
	0.958025	664899	573940	4642.98	80436	2969.78	0.76013	2.1002	171.435	2716.42	0.83004	0.0031934	775.585	0.0023201	601.508	0.0069923	1575.01	0.0030798	3.5809e-05	1.7164	0.72651	4.4357	0.80183	2.4437	116.054	2010.32	0.56759	0.0030205	808.834	0.0023704	659.081	0.0078684	1833.47	0.0022275	33.2199	0.26874	4.6557	0.17189	0.82553	0.74422	2.2613	1.3541	0.054927	0.23434	0.35208	2.3823	0.3522	3.0788	49.657
	0.655963	1040859	612160	4653.39	80992	2974.25	0.70063	2.4935	225.403	2447.82	0.84034	0.0043148	672.826	0.0027119	495	0.01165	1531.04	0.0024631	5.88e-05	2.1357	0.57161	3.4796	0.7622	3.2403	131.362	1651.48	0.51764	0.0044254	725.259	0.003022	575.6	0.014658	1963.35	0.0035969	35.9861	0.27355	4.7612	0.17484	0.8124	0.6717	2.4769	1.3352	0.078523	0.28019	0.61637	2.3459	0.61657	3.3756	48.9631
	Shapiro-Wilks						0.6741			0.6627	0.6896												0.821				0.351												0.0105							0.0042
	Mean	675667	443008	4988.39	70001.9	3297.89	0.752476	2.16965	168.839	2679.7	0.829311	0.00256513	891.125	0.00187125	682.724	0.00568753	1864.71	0.00373191	2.36082e-05	1.70086	0.693186	5.25668	0.804072	2.57227	108.527	2016.54	0.563643	0.00256615	917.631	0.00203576	749.261	0.00656291	2199.93	0.00227954	25.6976	0.289561	4.06138	0.191457	0.844887	0.880047	1.73123	1.24491	0.0193536	0.124208	0.287429	2.5636	0.287524	3.10481	45.6542
	SD	132778	111760	323.352	8937.52	338.495	0.0243668	0.144593	23.1361	114.246	0.00727027	0.000892716	114.722	0.000492197	94.4186	0.00276408	234.1	0.000759643	1.10017e-05	0.437207	0.110003	1.07342	0.0210093	0.314601	11.6238	188.895	0.0236771	0.000754904	113.296	0.000503214	99.3814	0.00309553	296.895	0.000472724	6.45166	0.0197299	0.509702	0.0203157	0.0352536	0.094454	0.331864	0.0833933	0.0217376	0.0648216	0.126901	0.104453	0.126942	0.192635	3.05621
	95% IC +	735370	493261	5133.78	74020.6	3450.09	0.763432	2.23466	179.242	2731.07	0.83258	0.00296653	942.709	0.00209257	725.179	0.00693039	1969.97	0.00407348	2.85551e-05	1.89745	0.742649	5.73934	0.813519	2.71373	113.754	2101.48	0.57429	0.00290559	968.575	0.00226203	793.948	0.00795481	2333.43	0.0024921	28.5985	0.298432	4.29057	0.200592	0.860739	0.922518	1.88045	1.2824	0.0291279	0.153355	0.344489	2.61057	0.344604	3.19143	47.0284
	95% IC -	615964	392755	4842.99	65983.1	3145.69	0.74152	2.10463	158.436	2628.33	0.826042	0.00216372	839.54	0.00164994	640.269	0.00444467	1759.44	0.00339034	1.86613e-05	1.50428	0.643723	4.77402	0.794625	2.43081	103.301	1931.61	0.552997	0.00222671	866.688	0.00180949	704.575	0.00517102	2066.43	0.00206698	22.7966	0.280689	3.83219	0.182322	0.829036	0.837576	1.58201	1.20741	0.00957941	0.0950609	0.230368	2.51663	0.230445	3.0182	44.28
	Variability	19.6514	25.2275	6.4821	12.7676	10.264	3.23822	6.66434	13.7031	4.26339	0.876665	34.802	12.8739	26.3031	13.8297	48.5991	12.5542	20.3554	46.6014	25.705	15.8692	20.4202	2.61287	12.2305	10.7105	9.36727	4.20072	29.4177	12.3466	24.7187	13.2639	47.167	13.4956	20.7377	25.1061	6.81374	12.55	10.6111	4.17258	10.7328	19.1692	6.69876	112.318	52.188	44.1503	4.07445	44.15	6.2044	6.69426
3DRAMLA	kBq/mL	Second angular moment	Contrast	Homogeneity	Dissimilarity	Inverse difference moment	Short run emphasis	Long run emphasis	Intensity variability	Run-length variability	Run percentage	Low-intensity run emphasis	High-intensity run emphasis	Low-intensity short-run emphasis	High-intensity short-run emphasis	Low-intensity long-run emphasis	High-intensity long-run emphasis	Coarseness	Contrast	Busyness	Complexity	Strength	Short-zone emphasis	Large-zone emphasis	Intensity variability	Size-zone variability	Zone percentage	Low-intensity zone emphasis	High-intensity zone emphasis	Low-intensity short-zone emphasis	High-intensity short-zone emphasis	Low-intensity large-zone emphasis	High-intensity large-zone emphasis	Second angular moment	Contrast	Homogeneity	Dissimilarity	Inverse difference moment	Correlation	Minimum SUV	Maximum SUV	Mean SUV	SUV Variance	SUV SD	SUV Skewness	SUV Kurtosis	SUV bias-corrected Skewness	SUV bias-corrected Kurtosis	TLG
	23.5168	27233	181092	1019.88	21936	616.029	0.81603	1.8222	32.8419	728.397	0.80665	0.0039263	844.07	0.0033069	712.058	0.0070968	1415.85	0.012205	0.00018204	0.36758	3.9067	15.0585	0.85432	2.042	23.8636	603.12	0.60984	0.0041291	882.423	0.0036567	769.381	0.007741	1599.4	0.0015851	43.6893	0.24605	5.2922	0.14862	0.79845	0.84005	1.3328	1.045	0.0068252	0.082578	0.33078	2.5166	0.33123	2.8685	74.0339
	19.5827	29415	160922	1063.91	20622	667.966	0.79429	1.9146	34.2467	686.388	0.79487	0.0020926	1280.68	0.0018622	1028.3	0.0031208	2383.95	0.011403	0.0001634	0.46431	3.5627	12.7664	0.83812	1.9943	25.3711	573.481	0.60499	0.0024186	1286.67	0.0022319	1088.7	0.0035142	2501.8	0.0017337	39.0682	0.25829	5.0066	0.16217	0.78467	0.75678	1.2931	1.0406	0.0068359	0.082642	0.1658	2.5142	0.16602	3.0097	73.7213
	14.8334	20667	257554	902.327	26506	503.617	0.85215	1.6221	28.0129	790.896	0.80319	0.004261	1059.95	0.0039526	908.113	0.0055338	1703.21	0.011076	0.00024737	0.32676	5.243	13.9399	0.87602	1.667	22.2565	671.821	0.6431	0.00473	1073.45	0.0044527	945.822	0.006074	1780.39	0.0011834	61.6305	0.21592	6.3427	0.12051	0.77567	0.84647	1.2779	1.0485	0.0064928	0.080541	0.14449	2.5187	0.14469	2.5609	74.2875
	13.5787	26543	208886	994.3	23398	596.912	0.82635	1.7543	33.692	741.394	0.80111	0.0047849	794.914	0.0040755	666.941	0.0077342	1343.6	0.01079	0.00020162	0.43827	4.1499	12.2634	0.86345	1.7525	25.1496	637.119	0.62994	0.0051553	809.76	0.0046281	710.144	0.0086042	1338.72	0.0015375	50.2734	0.2393	5.6313	0.14366	0.75813	0.87455	1.3175	1.0518	0.0052147	0.072181	0.23852	2.5348	0.23884	3.0863	74.5194
	12.3519	28356	189514	1018.47	22402	625.016	0.81907	1.8054	35.9424	722.002	0.79418	0.0026773	996.433	0.0023686	816.844	0.0040512	1768.58	0.010381	0.00016599	0.55394	4.0065	11.4798	0.86376	1.8173	27.2503	633.753	0.62578	0.0029857	997.751	0.0027598	859.561	0.0042416	1806.78	0.001656	45.7985	0.24613	5.4137	0.15104	0.73345	0.82432	1.3124	1.0504	0.0052317	0.072298	0.047853	2.5331	0.047918	3.0327	74.4185
	11.2359	25802	204086	961.221	23642	552.352	0.8468	1.6621	33.3891	788.882	0.8122	0.0030254	967.816	0.002716	831.337	0.0043569	1548.27	0.010375	0.00019423	0.45079	4.5784	13.0057	0.87882	1.6965	25.7775	675.505	0.64172	0.003352	978.192	0.003116	865.287	0.0046924	1584.68	0.0014824	48.918	0.2304	5.6668	0.1324	0.76847	0.86365	1.3181	1.0678	0.0055559	0.074504	0.19259	2.5324	0.19286	2.9821	75.6519
	9.59552	21703	273288	915.705	26796	521.125	0.84632	1.6958	30.7262	775.326	0.79972	0.0024619	1196.04	0.0022649	1016.7	0.0033588	2008.13	0.010207	0.00023483	0.41417	5.1612	11.8451	0.87806	1.6981	23.881	672.924	0.64033	0.0027698	1204.72	0.0026122	1059.13	0.0036692	2009.3	0.0012523	65.6469	0.21996	6.4367	0.12518	0.72024	0.88872	1.3093	1.1016	0.0052599	0.072492	0.096589	2.5386	0.09672	2.7901	78.0441
	7.742	25615	221604	945.333	24376	534.812	0.85025	1.6484	33.2926	793.445	0.81012	0.0030179	942.113	0.0027299	808.276	0.0042826	1513.48	0.010738	0.00020677	0.41826	4.6752	12.9942	0.8791	1.6962	24.6432	675.489	0.64103	0.0033335	969.921	0.0031023	861.74	0.0045888	1583.44	0.0014681	53.0534	0.22632	5.8358	0.12804	0.75692	0.88059	1.3649	1.0964	0.0065695	0.081016	0.28433	2.5257	0.28472	2.9373	77.6771
	6.36595	21145	287830	884.395	28070	499.795	0.8587	1.6038	30.4857	797.759	0.79764	0.0051256	978.482	0.004058	841.075	0.0094472	1566.65	0.0096565	0.00025971	0.40879	5.6637	11.9077	0.88732	1.61	23.8714	701.493	0.65211	0.0053608	979.999	0.0041598	870.801	0.010368	1592.16	0.0012119	68.9083	0.21173	6.7201	0.11965	0.71901	0.90462	1.3906	1.1224	0.0075457	0.086826	0.13859	2.5177	0.13878	2.7937	79.5216
	4.38639	29123	198890	986.038	23078	585.296	0.81252	1.7965	37.3214	712.183	0.79349	0.0025916	956.353	0.0022909	789.061	0.0038553	1664.76	0.0098402	0.00016716	0.61311	3.9749	10.8321	0.85129	1.9155	27.714	603.396	0.61538	0.0028764	983.251	0.0026473	846.542	0.0043447	1757.87	0.0017	48.0527	0.23823	5.5757	0.14141	0.70993	0.80691	1.4827	1.1145	0.0095335	0.097596	0.30999	2.5001	0.31041	3.2774	78.9615
	2.98448	26414	219958	954.858	24290	549.635	0.84363	1.6561	35.0877	777.676	0.80596	0.002646	1077.25	0.0023301	915.856	0.003937	1762.96	0.010066	0.0001872	0.54418	4.2949	10.9851	0.87975	1.6735	27.4116	678.638	0.6431	0.0028138	1088.85	0.0026108	960.884	0.0040258	1807.26	0.0015176	52.7224	0.22887	5.8221	0.13174	0.71295	0.79729	1.5216	1.1482	0.012084	0.10988	-0.032743	2.4766	-0.032788	3.0124	81.3506
	2.04348	23483	242066	937.276	25450	542.653	0.82666	1.75	33.1246	731.833	0.79002	0.0026923	1020.78	0.0024197	850.219	0.0038763	1750.61	0.0098531	0.00020177	0.49013	4.9414	11.8052	0.86015	1.7563	25.5998	630.233	0.62855	0.0029814	1037.66	0.0027672	897.909	0.0041894	1779.25	0.0013681	58.4277	0.22623	6.1429	0.13098	0.71943	0.71949	1.6311	1.1453	0.021713	0.14729	0.28421	2.406	0.28459	2.8646	81.1428
	1.39918	20827	293642	901.918	27726	511.634	0.85594	1.6348	29.8727	783.63	0.78933	0.0041903	877.368	0.0036235	770.495	0.0066886	1350.97	0.010124	0.00027079	0.3874	5.0984	11.5617	0.8741	1.6851	23.3701	665.652	0.64033	0.0044372	916.222	0.0039196	824.873	0.0070513	1417.15	0.0011949	70.3334	0.21603	6.641	0.12255	0.72298	0.76807	1.7185	1.1683	0.029017	0.17027	0.31671	2.3653	0.31714	2.7967	82.7749
	0.958025	26662	225090	974.034	24058	573.703	0.82072	1.7699	35.5739	745.859	0.81635	0.0060714	663.186	0.0053951	556.606	0.0089752	1120.58	0.010173	0.00020104	0.46387	4.6964	13.7831	0.85948	1.8869	25.3897	620.088	0.61885	0.0070368	680.114	0.006497	596.417	0.010217	1194.25	0.0015451	54.1863	0.23448	5.7915	0.13811	0.74457	0.72033	1.8674	1.1316	0.035236	0.18763	0.62542	2.3524	0.62627	3.5123	80.1682
	0.655963	26437	249708	915.394	25912	509.675	0.84836	1.651	35.0816	778.788	0.79834	0.0036226	784.401	0.0031945	680.588	0.0054536	1228.13	0.0094619	0.00021951	0.5487	4.3543	10.1531	0.88084	1.711	27.6797	678.193	0.64033	0.0038098	819.53	0.0034855	734.441	0.0057462	1306.21	0.0015182	59.839	0.21936	6.2094	0.12214	0.68997	0.59376	1.9658	1.1492	0.045777	0.21386	0.44574	2.2935	0.44635	3.2335	81.4167
	Shapiro-Wilks						0.1735			0.1165	0.7759												0.2264				0.1292												0.5862			0.1082				0.001			0.1089
	Mean	25295	227609	958.338	24550.8	559.348	0.834519	1.71913	33.2461	756.964	0.800878	0.00354581	962.656	0.00310589	812.831	0.00545122	1608.65	0.0104233	0.000206895	0.459351	4.55384	12.2921	0.868305	1.77348	25.2819	648.06	0.631692	0.00387935	980.567	0.00350979	859.442	0.00593785	1670.58	0.00146362	54.7032	0.230487	5.9019	0.134547	0.740989	0.805707	1.47358	1.09877	0.0139261	0.108774	0.239258	2.47505	0.239583	2.98388	77.846
	SD	2998.63	39242.3	51.3668	2163.78	50.3522	0.0192137	0.0903443	2.53819	34.9907	0.00811783	0.00115035	159.104	0.000961701	127.389	0.0020615	317.761	0.000722199	3.36453e-05	0.0787145	0.589428	1.30964	0.0137578	0.129258	1.68264	36.5445	0.0140361	0.00127002	152.86	0.00110523	127.728	0.00233167	320.108	0.000182605	9.27121	0.0132537	0.501294	0.0126718	0.0314433	0.0832781	0.222878	0.044873	0.0128926	0.0472316	0.163194	0.0798493	0.163416	0.232905	3.17966
	95% IC +	26643.3	245254	981.435	25523.7	581.989	0.843159	1.75976	34.3874	772.697	0.804528	0.00406306	1034.2	0.00353832	870.111	0.00637816	1751.53	0.010748	0.000222024	0.494744	4.81887	12.8809	0.874491	1.8316	26.0385	664.492	0.638003	0.00445041	1049.3	0.00400676	916.874	0.00698628	1814.51	0.00154573	58.872	0.236446	6.12731	0.140245	0.755128	0.843152	1.5738	1.11895	0.0197232	0.130011	0.312637	2.51095	0.313063	3.0886	79.2757
	95% IC -	23946.7	209964	935.241	23577.9	536.707	0.82588	1.67851	32.1048	741.23	0.797228	0.00302855	891.116	0.00267347	755.551	0.00452428	1465.77	0.0100986	0.000191767	0.423957	4.28881	11.7032	0.862119	1.71536	24.5253	631.628	0.625381	0.00330829	911.834	0.00301283	802.009	0.00488943	1526.64	0.00138151	50.5344	0.224527	5.67649	0.128849	0.726851	0.768261	1.37336	1.0786	0.008129	0.0875361	0.165878	2.43914	0.166104	2.87916	76.4163
	Variability	11.8546	17.2411	5.35999	8.81348	9.00194	2.30237	5.25522	7.63456	4.62251	1.01362	32.4426	16.5276	30.9637	15.6723	37.8171	19.7533	6.92869	16.262	17.136	12.9435	10.6544	1.58444	7.28841	6.65552	5.63905	2.22199	32.7381	15.5889	31.49	14.8617	39.2679	19.1615	12.4763	16.9482	5.75031	8.49377	9.41817	4.24342	10.336	15.1249	4.08392	92.5786	43.4219	68.2083	3.22617	68.2083	7.80544	4.08456
[truncated: 18 more columns]
